# Supplementary material for: HCV-associated exosomes promote myeloid-derived suppressor cell expansion via inhibiting miR-124 to regulate T follicular cell differentiation and function
Source: PubMed Central journal article supplement (PMC6131392; doi:10.1038/s41421-018-0052-z), 2018-09-11
Supplement: 41421_2018_52_MOESM1_ESM.pdf [file 41421_2018_52_MOESM1_ESM.pdf]

**a**

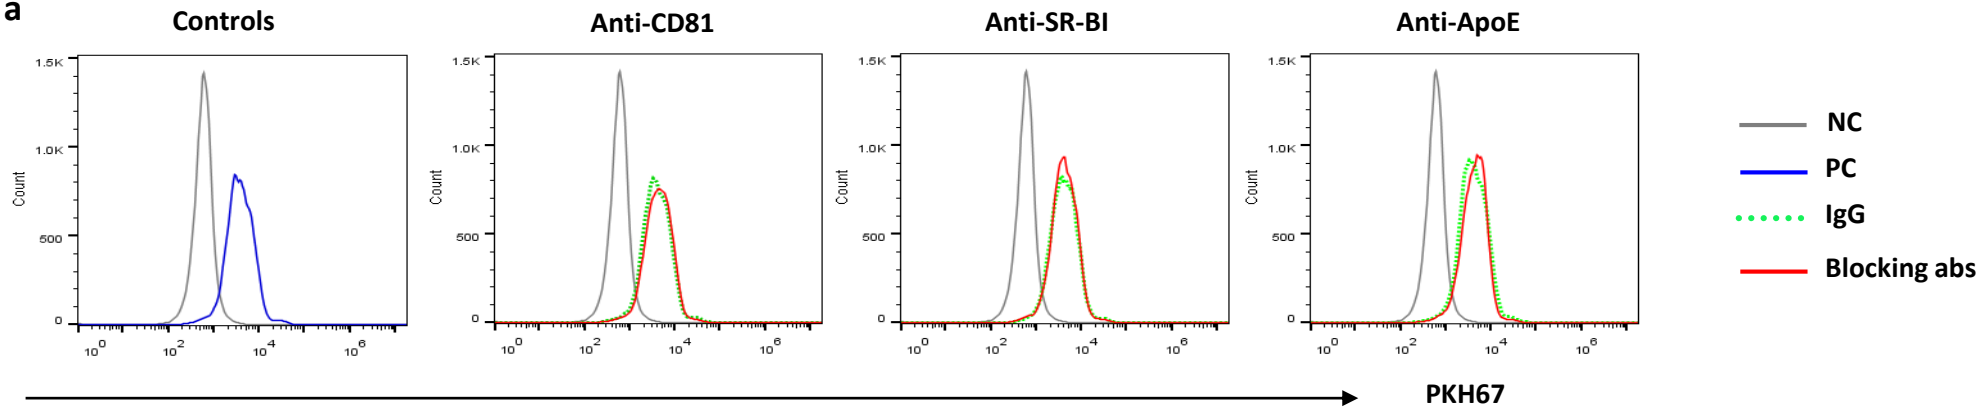

**b**

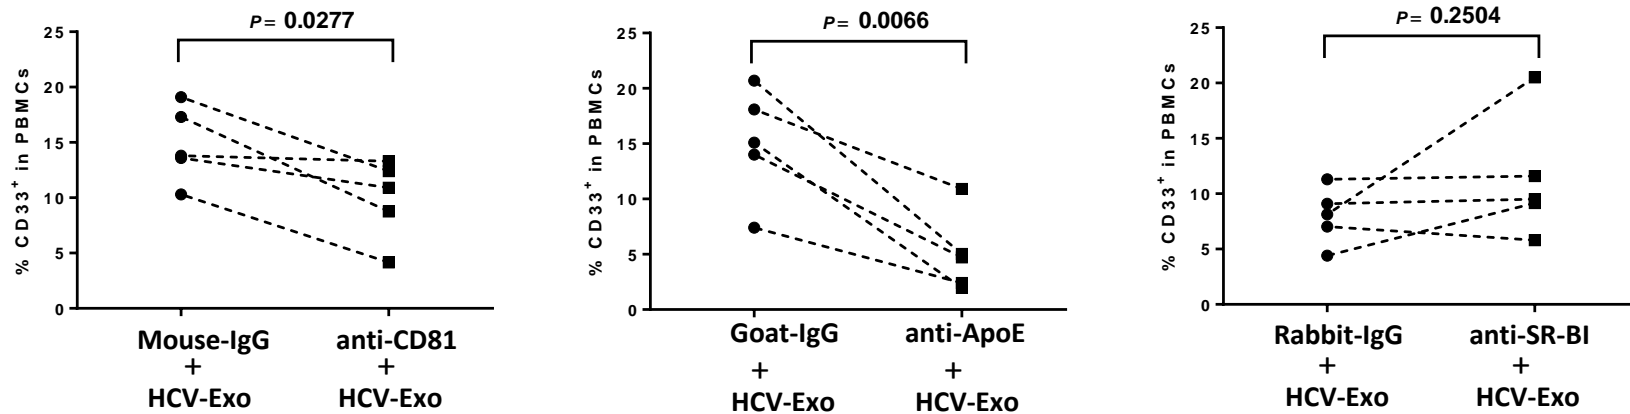

**c**

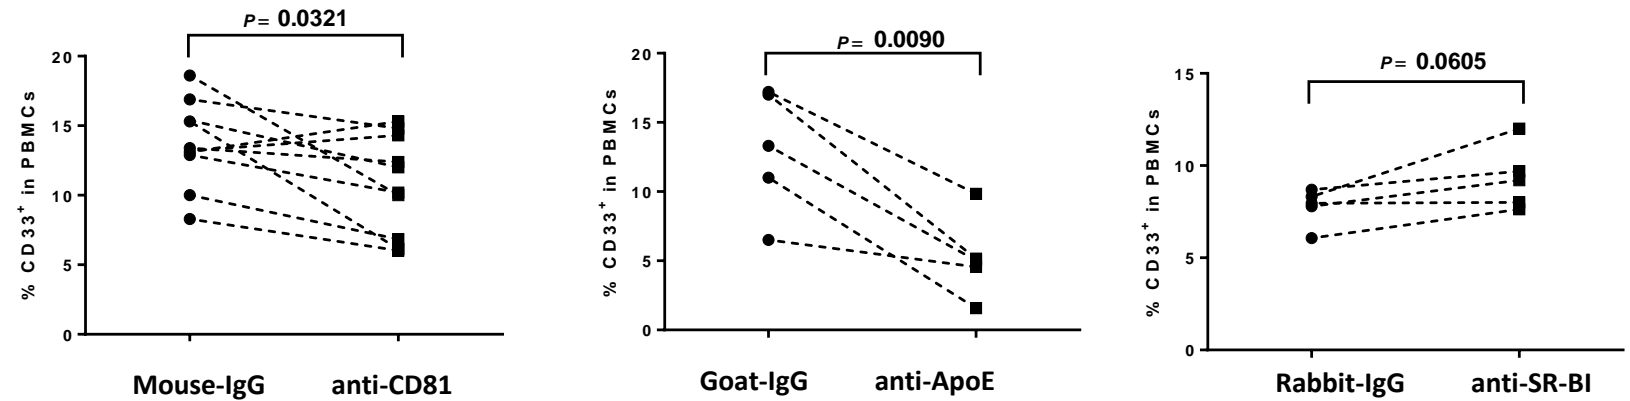

853 **Supplementary Fig. S1 The role of CD81, SR-BI, and ApoE receptors in HCV-Exo entry and**  
854 **effect on myeloid cells. a** Blocking HCV-Exo uptake by myeloid cells. Purified CD33<sup>+</sup> cells were  
855 incubated with anti-CD81, SR-BI, and ApoE blocking antibodies or isotype control IgG for 2 h,  
856 respectively, and then the PKH67-labelled HCV-Exo were added into the culture for 1 h, after  
857 intensive washing, the cells was analyzed by flow cytometry for fluorescence signal. Cells  
858 incubated with unlabeled HCV-Exo or PKH67-labelled HCV-Exo alone without blocking  
859 antibodies serve as negative control (NC) and positive control (PC). Representative overlaid  
860 histograms of the flow data are shown. **b, c** Functional blocking the effect of HCV-Exo on myeloid  
861 cell differentiation. PBMCs were incubated with anti-CD81, SR-BI, and ApoE blocking antibodies  
862 or isotype control IgG for 2 h, respectively, and cultured in the presence (B) or absence (C) of  
863 HCV-Exo for 3 days. The frequency of CD33<sup>+</sup> myeloid cells in PBMCs were analyzed by flow  
864 cytometry.
